# Supplementary material for: Sensitivity of predicted ultrafine particle size distributions in Europe to different nucleation rate parameterizations using PMCAMx-UF v2.2
Source: Copernicus journal article supplement (doi:10.5194/gmd-18-1103-2025), 2025-02-26
Supplement: Supplementary file 1 [file gmd-18-1103-2025-supplement.pdf]

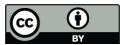

*Supplement of*

## **Sensitivity of predicted ultrafine particle size distributions in Europe to different nucleation rate parameterizations using PMCAMx-UF v2.2**

**David Patoulias et al.**

*Correspondence to:* Spyros N. Pandis ([spyros@chemeng.upatras.gr](mailto:spyros@chemeng.upatras.gr))

The copyright of individual parts of the supplement might differ from the article licence.

**Table S1.** Vertical height for each simulated layer.

| <b>Layer number</b> | <b>Bottom height (m)</b> | <b>Top height (m)</b> |
|---------------------|--------------------------|-----------------------|
| 1                   | 0                        | 60                    |
| 2                   | 60                       | 150                   |
| 3                   | 150                      | 260                   |
| 4                   | 260                      | 400                   |
| 5                   | 400                      | 590                   |
| 6                   | 590                      | 820                   |
| 7                   | 820                      | 1100                  |
| 8                   | 1100                     | 1670                  |
| 9                   | 1670                     | 2300                  |
| 10                  | 2300                     | 2950                  |
| 11                  | 2950                     | 3650                  |
| 12                  | 3650                     | 4900                  |
| 13                  | 4900                     | 6200                  |
| 14                  | 6200                     | 7500                  |

**Table S2.** Description of atmospheric measurement sites in Europe used in this work.

| Station | Name                       | Country        | Longitude | Latitude |
|---------|----------------------------|----------------|-----------|----------|
| ANB     | Annaberg-Buchholz          | Germany        | 50.5717   | 12.9989  |
| ASP     | Aspvreten                  | Sweden         | 58.8000   | 17.3833  |
| BRK     | Birkenes II                | Norway         | 58.3885   | 8.2520   |
| CBW     | Cabauw Zijdeweg            | Netherlands    | 51.9703   | 4.9264   |
| DSN     | Dresden-Nord               | Germany        | 51.0650   | 13.7414  |
| DSW     | Dresden-Winckelmannstrasse | Germany        | 51.0361   | 13.7306  |
| FNK     | Finokalia                  | Greece         | 35.3167   | 25.6667  |
| GDN     | Giordan Lighthouse         | Malta          | 36.0722   | 14.2184  |
| HOH     | Hohenpeissenberg           | Germany        | 47.8015   | 11.0096  |
| HYY     | Hyytiala                   | Finland        | 61.8500   | 24.2833  |
| ISP     | Ispira                     | Italy          | 45.8000   | 8.6333   |
| KPU     | K-puszta                   | Hungary        | 46.9667   | 19.5833  |
| KST     | Kosetice (NOAK)            | Czech Republic | 49.5734   | 15.0803  |
| MLP     | Melpitz                    | Germany        | 51.5301   | 12.9339  |
| MNT     | Montseny                   | Spain          | 41.7667   | 2.3500   |
| PRG     | Prague-Suchdol             | Czech Republic | 50.1264   | 14.3846  |
| USM     | Usti n.L.-mesto            | Czech Republic | 50.6611   | 14.0403  |
| VAV     | Vavihill                   | Sweden         | 56.0167   | 13.1500  |
| VRR     | Varrjo                     | Finland        | 67.7667   | 29.5833  |
| VSM     | TMNT09 Vielsalm            | Belgium        | 50.3040   | 6.0013   |
| WLD     | Waldhof                    | Germany        | 52.8022   | 10.7594  |
| ZUG     | Zugspitze-Schneefernerhaus | Germany        | 47.4165   | 10.9796  |
| NEO     | Costa Navarino             | Greece         | 36.9932   | 21.6572  |
| PAT     | Patra-ICE-HT               | Greece         | 38.2980   | 21.8092  |
| SPC     | San Pietro Capofiume       | Italy          | 44.6553   | 11.6236  |
| THE     | Thessaloniki               | Greece         | 40.6166   | 23.0333  |

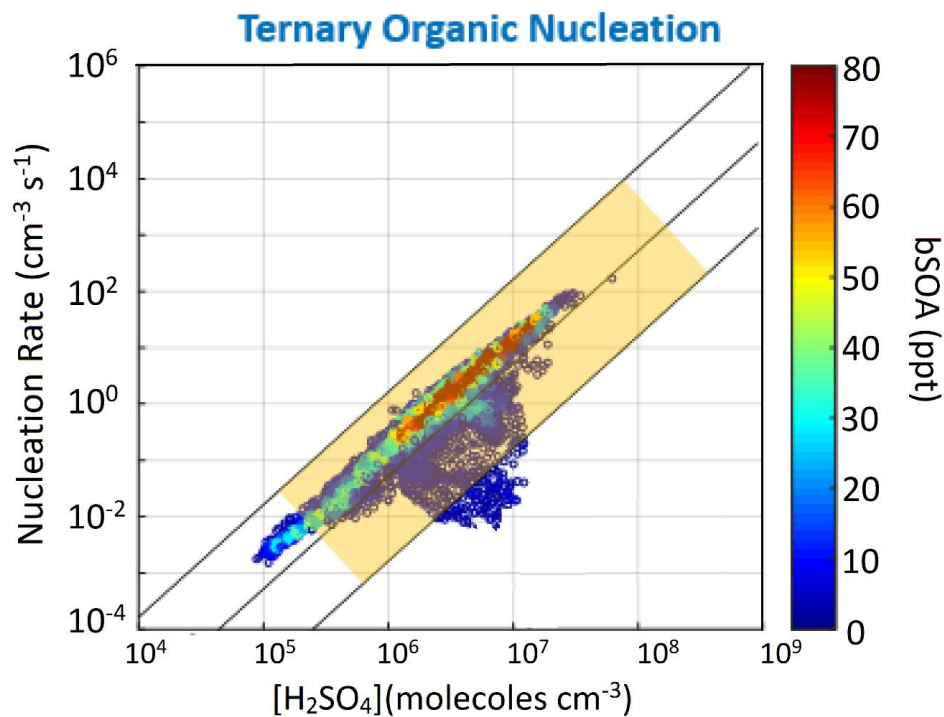

**Figure S1.** Modeled nucleation rate as a function of  $\text{H}_2\text{SO}_4$  concentration. Solid diagonal lines provide the bounds for the observations according to Chen et al. (2012).

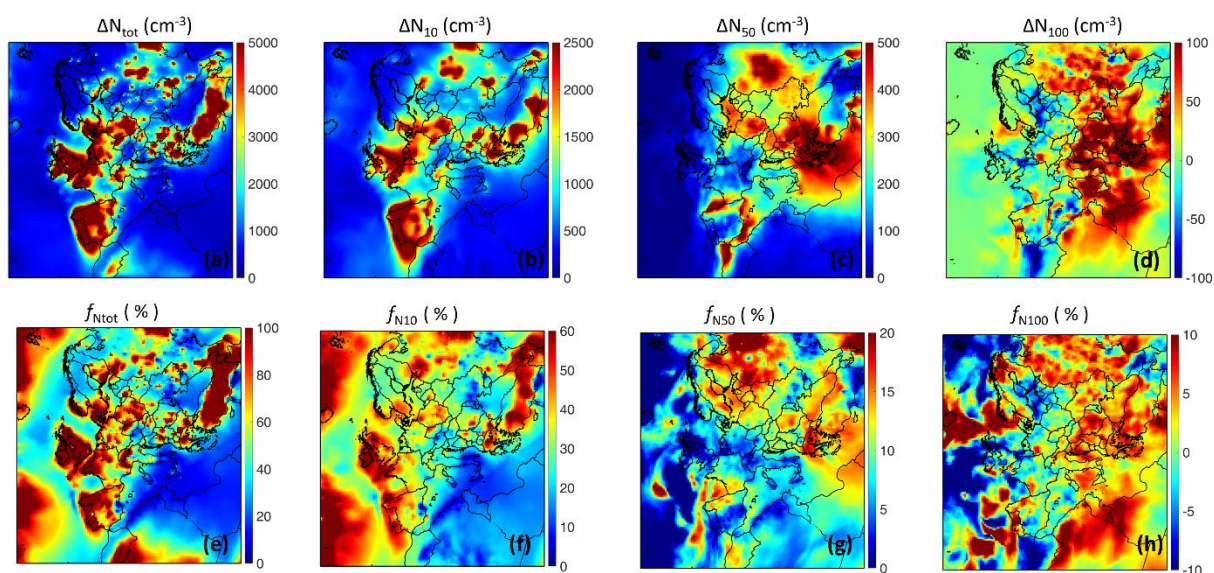

**Figure S2.** Average ground increase of number concentration (in  $\text{cm}^{-3}$ ) (a-b-c-d) and fractional increase ( $f_{N_x}$ ) of number concentration (in %) (e-f-g-h) for Case 2 (increase in the nucleation rate by a factor of 10) for ternary ammonia nucleation during 5 June – 8 July 2012 for: (a, e) all particles ( $f_{N_{tot}}$ ); (b, f) particles above 10 nm ( $f_{N_{10}}$ ); (c, g) above 50 nm ( $f_{N_{50}}$ ); and (d, h) above 100 nm ( $f_{N_{100}}$ ). Different scales are used.

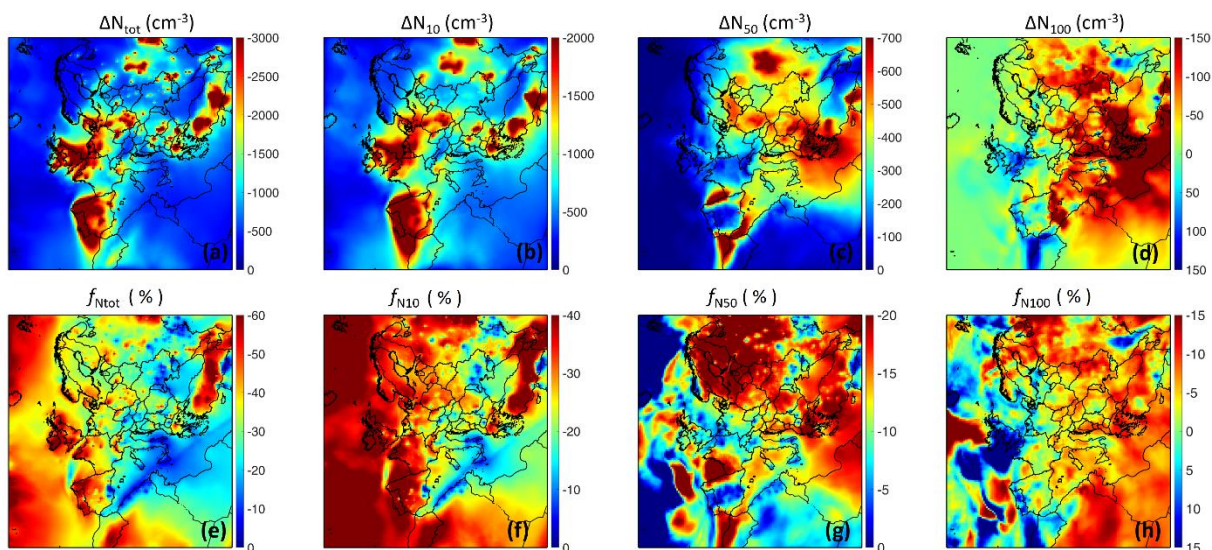

**Figure S3.** Average ground increase of number concentration (in  $\text{cm}^{-3}$ ) (a-b-c-d) and fractional increase ( $f_{N_x}$ ) of number concentration (in %) (e-f-g-h) for Case 3 (decrease in the nucleation rate by a factor of 10) for ternary ammonia nucleation during 5 June – 8 July 2012 for: (a, e) all particles ( $f_{N_{tot}}$ ); (b, f) particles above 10 nm ( $f_{N_{10}}$ ); (c, g) above 50 nm ( $f_{N_{50}}$ ); and (d, h) above 100 nm ( $f_{N_{100}}$ ). Different scales are used.

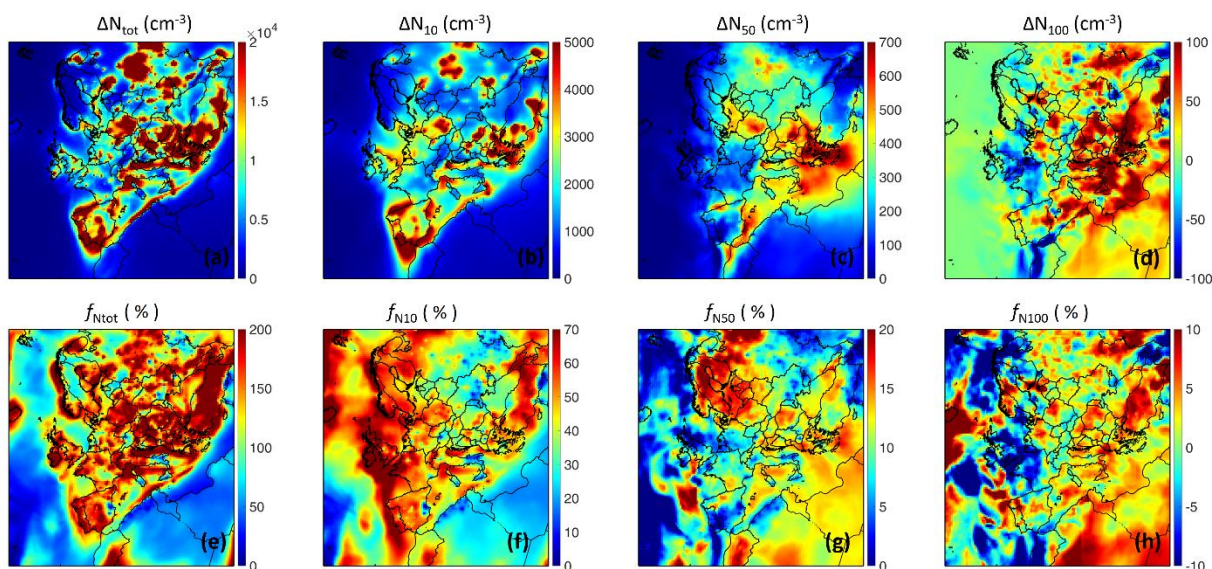

**Figure S4.** Average ground increase of number concentration (in  $\text{cm}^{-3}$ ) (a-b-c-d) and fractional increase ( $f_{N_x}$ ) of number concentration (in %) (e-f-g-h) for Case 5 (increase in the nucleation rate by a factor of 10) of organic nucleation during 5 June – 8 July 2012 for: (a, e) all particles ( $f_{N_{tot}}$ ); (b, f) particles above 10 nm ( $f_{N_{10}}$ ); (c, g) above 50 nm ( $f_{N_{50}}$ ); and (d, h) above 100 nm ( $f_{N_{100}}$ ). Different scales are used.

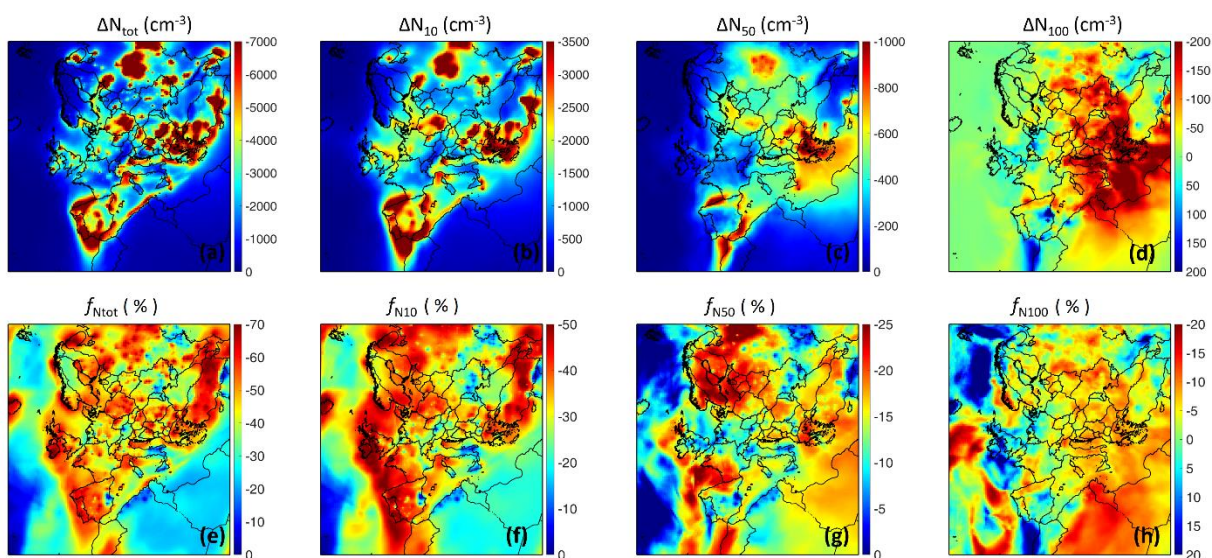

**Figure S5.** Average ground increase of number concentration (in  $\text{cm}^{-3}$ ) (a-b-c-d) and fractional increase ( $f_{N_x}$ ) of number concentration (e-f-g-h) for Case 6 (decrease in the nucleation rate by a factor of 10) of organic nucleation during 5 June – 8 July 2012 for: (a, e) all particles ( $f_{N_{tot}}$ ); (b, f) particles above 10 nm ( $f_{N_{10}}$ ); (c, g) above 50 nm ( $f_{N_{50}}$ ); and (d, h) above 100 nm ( $f_{N_{100}}$ ). Different scales are used.

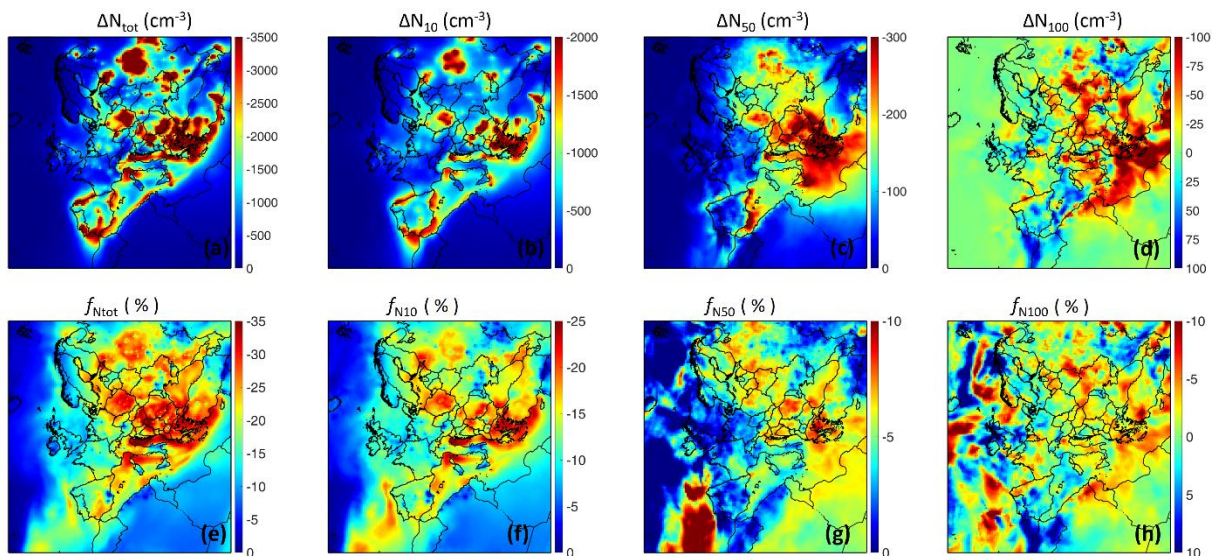

**Figure S6.** Average ground increase of number concentration (in  $\text{cm}^{-3}$ ) (a-b-c-d) and fractional increase ( $f_{N_x}$ ) of number concentration (in %) (e-f-g-h) for Case 7 (decrease of nuclei diameter to 1 nm) of organic nucleation during 5 June – 8 July 2012 for: (a, e) all particles ( $f_{N_{tot}}$ ); (b, f) particles above 10 nm ( $f_{N_{10}}$ ); (c, g) above 50 nm ( $f_{N_{50}}$ ); and (d, h) above 100 nm ( $f_{N_{100}}$ ). Different scales are used.

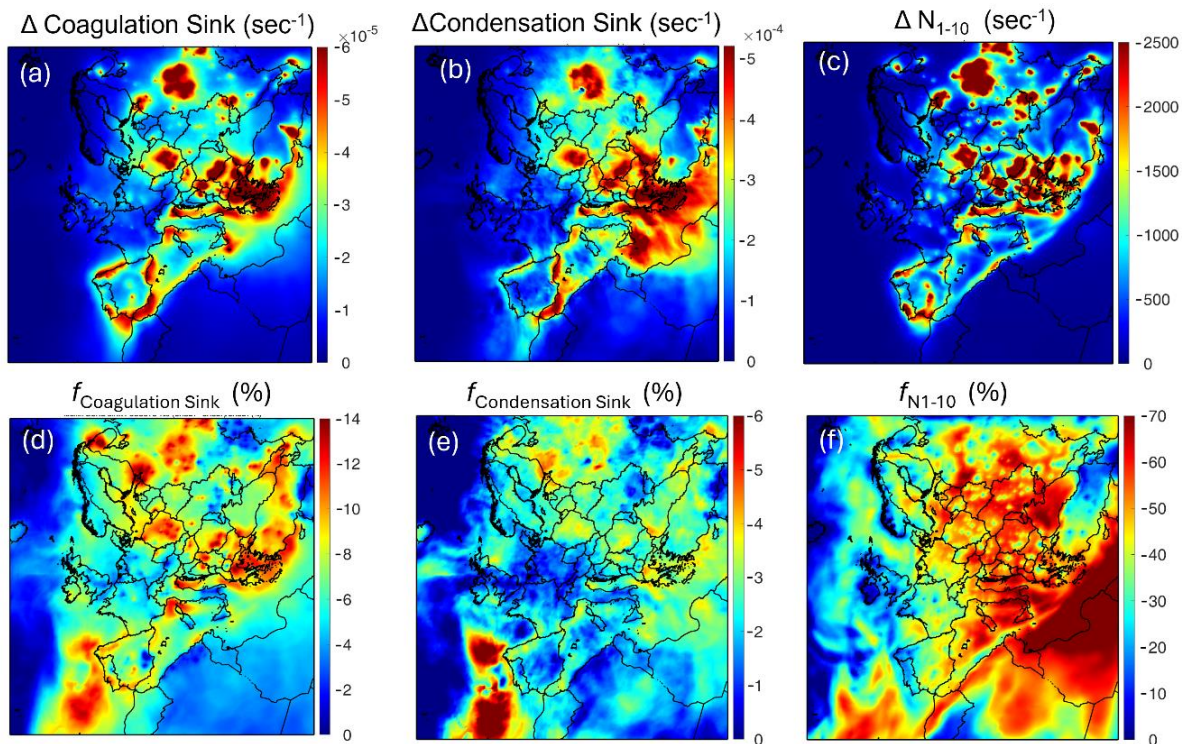

**Figure S7.** Average ground increase for (a) coagulation sink (in  $\text{sec}^{-1}$ ), (b) condensation sink (in  $\text{sec}^{-1}$ ), (c) number concentration particles between 0.8 nm and 10 nm ( $N_{1-10}$ ) (in  $\text{cm}^{-3}$ ) and fractional increase ( $f_{N_x}$ ) of (d) coagulation sink (in %), (e) condensation sink (in %), (f) number concentration particles between 0.8 nm and 10 nm ( $N_{1-10}$ ) (in %) for Case 7 (decrease of nuclei diameter to 1 nm) of organic nucleation during 5 June – 8 July 2012. Different scales are used.

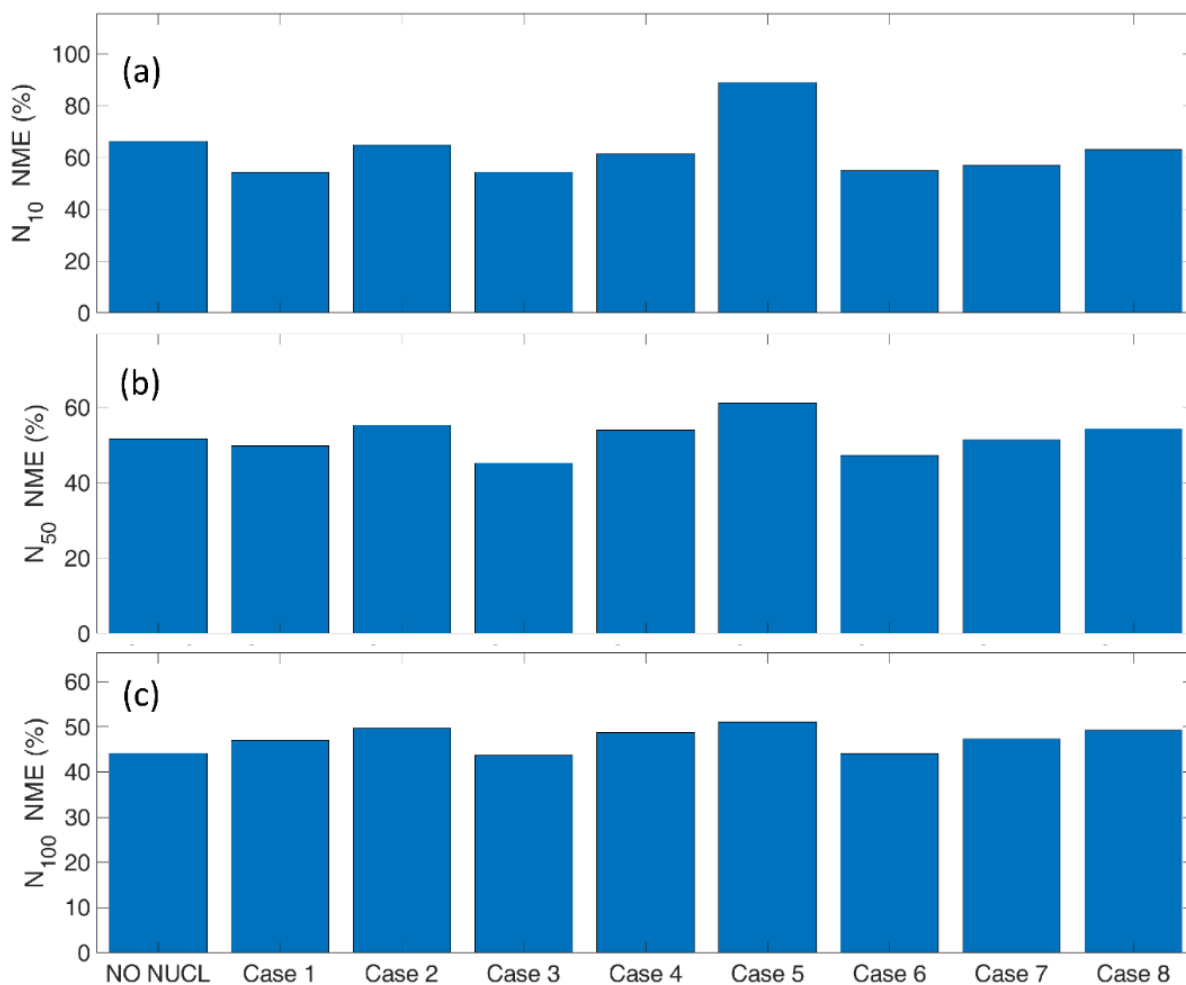

**Figure S8.** The NME for hourly a)  $N_{10}$ , b)  $N_{50}$  and c)  $N_{100}$  for the no-nucleation scenario, the ammonia ternary parameterization (Case 1) and the change by an order of magnitude in scaling factor (Cases 2 and 3), the biogenic parameterization (Case 4) with the change by an order of magnitude in scaling factor (Cases 5 and 6), decrease of nuclei diameter (Case 7) and the ELVOCs addition as the third species (Case 8).



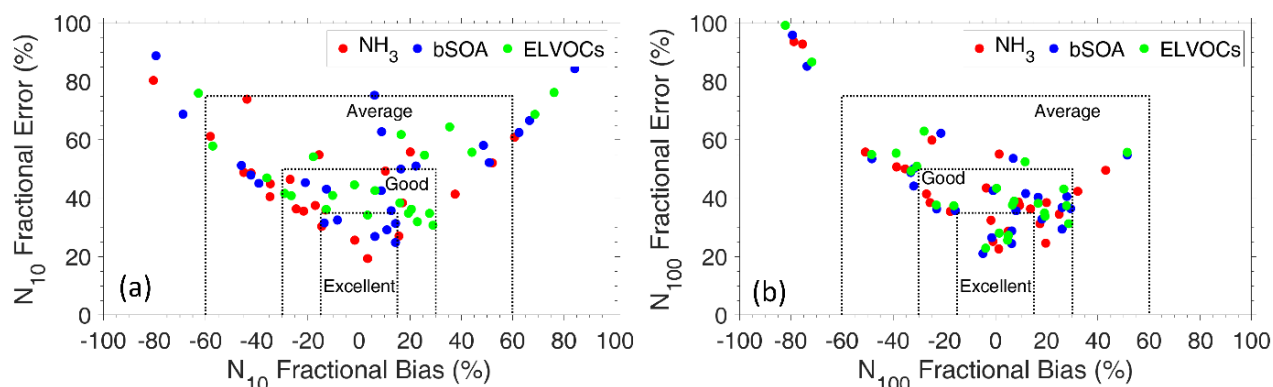

**Figure S9.** Model evaluation using fractional error (%) versus fractional bias (%) of daily number concentrations for (a)  $N_{10}$ , and (b)  $N_{100}$  for the ammonia ternary parameterization (Case 1; red dots), the biogenic parameterization (Case 4; blue dots), and the ELVOCs addition as the third species (Case 8).

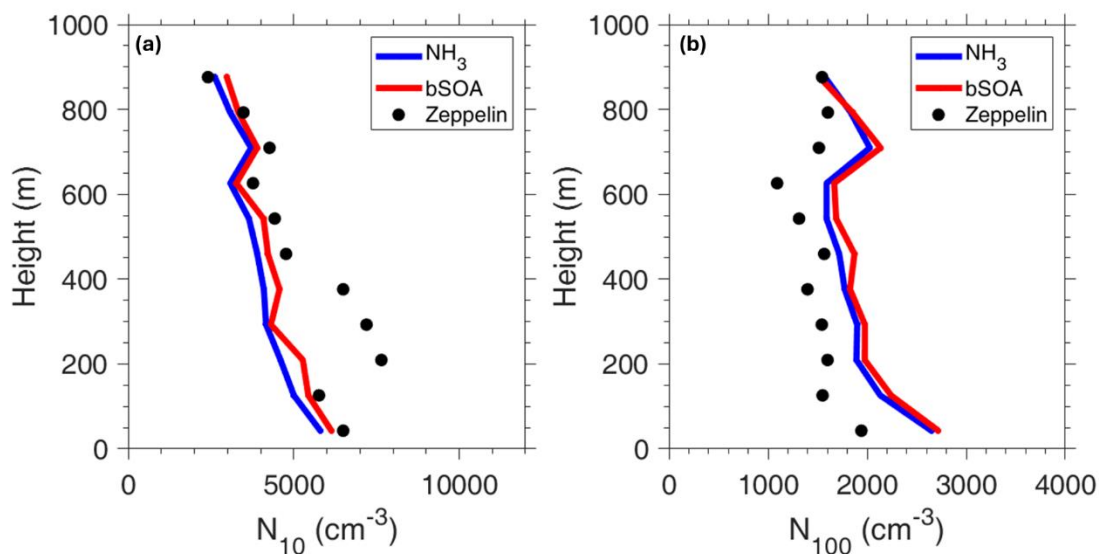

**Figure S10.** Comparison of predicted PMCAMx-UF for ammonia (blue line) and biogenic SOA (red line) parameterization vs. observed (black dots) vertical profiles of averaged particle number concentrations for (a)  $N_{10}$  and (b)  $N_{100}$  of 25 flights over the Po Valley during the PEGASOS campaign.
